# Supplementary material for: Citation Classics on Dental Caries: A Systematic Review
Source: PubMed Central journal article supplement — Eur J Dent. 2020 Mar 13;14(1):128–43. doi: 10.1055/s-0040-1703419 (PMC7069738; doi:10.1055/s-0040-1703419), 2020-03-13
Supplement: 10-1055-s-0040-1703419_00333_s1.pdf [file 10-1055-s-0040-1703419_00333_s1.pdf]

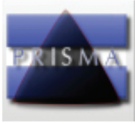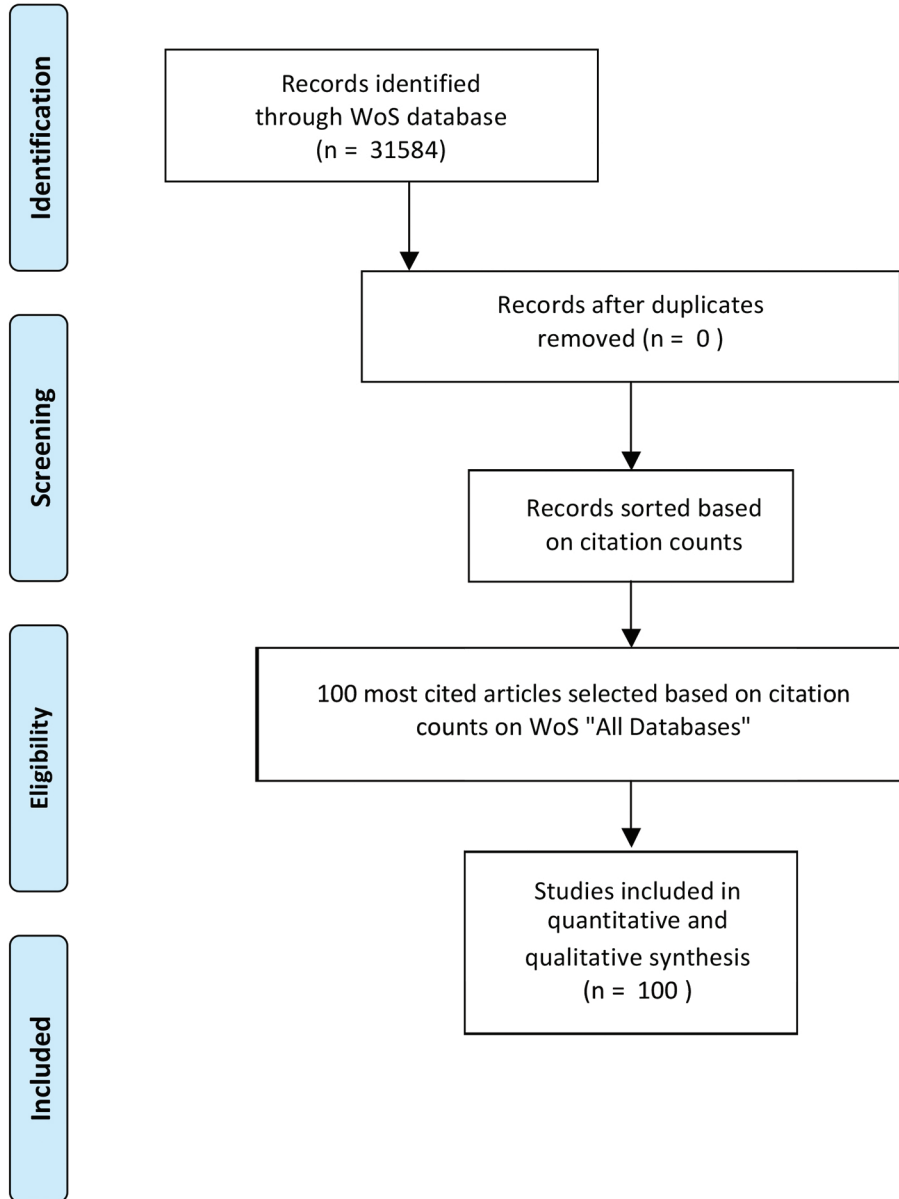

From: Moher D, Liberati A, Tetzlaff J, Altman DG, The PRISMA Group (2009). Preferred Reporting Items for Systematic Reviews and Meta-Analyses: The PRISMA Statement. PLoS Med 6(7): e1000097. doi:10.1371/journal.pmed1000097

For more information, visit [www.prisma-statement.org](http://www.prisma-statement.org).

Supplementary Fig. S1 PRISMA 2009 flow diagram.
