# Supplementary material for: Citation Classics on Dental Caries: A Systematic Review
Source: PubMed Central journal article supplement — Eur J Dent. 2020 Mar 13;14(1):128–43. doi: 10.1055/s-0040-1703419 (PMC7069738; doi:10.1055/s-0040-1703419), 2020-03-13
Supplement: 10-1055-s-0040-1703419_00333_s2.pdf [file 10-1055-s-0040-1703419_00333_s2.pdf]

**Supplementary Table S1** Number of articles an author appeared as the first author, as the corresponding author, as the first and the corresponding author, and as the coauthor

| Rank | Name of authors   | As first author | As corresponding author | As first and corresponding author | As coauthor | Total |
|------|-------------------|-----------------|-------------------------|-----------------------------------|-------------|-------|
| 1    | J.D. Featherstone | 2               | –                       | 2                                 | 2           | 6     |
| 2    | P. Axelsson       | 1               | –                       | 4                                 | –           | 5     |
| 3    | J. Lindhe         | –               | –                       | –                                 | 5           | 5     |
| 4    | B. Nyvad          | –               | –                       | 1                                 | 3           | 4     |
| 5    | N.B. Pitts        | –               | –                       | 1                                 | 3           | 4     |
| 6    | B. Krasse         | –               | 1                       | 1                                 | 1           | 3     |
| 7    | J. van Houte      | –               | –                       | 1                                 | 2           | 3     |
